# Supplementary material
Source: PubMed Central journal article supplement (PMC6023550)
Supplement: NIHMS955103-supplement-Supporting_Information.pdf [file NIHMS955103-supplement-Supporting_Information.pdf]

## SUPPORTING INFORMATION

### **Activated Microglia Targeting Dendrimer-minocycline Conjugate as Therapeutics for Neuroinflammation**

Rishi Sharma<sup>1</sup>, Soo-Young Kim<sup>1</sup>, Anjali Sharma<sup>1</sup>, Zhi Zhang<sup>3</sup>, Siva Pramodh Kambhampati<sup>1</sup>, Sujatha Kannan<sup>1,3,4,5</sup>, Rangaramanujam M Kannan<sup>1,2,4,5</sup>

<sup>1</sup>*Center for Nanomedicine, Department of Ophthalmology, Wilmer Eye Institute Johns Hopkins University School of Medicine, Baltimore, MD 21231, USA;*

<sup>2</sup>*Department of Chemical and Biomolecular Engineering, Johns Hopkins University, Baltimore MD, 21218, USA;*

<sup>3</sup>*Department of Anesthesiology and Critical Care Medicine, Johns Hopkins University School of Medicine, Baltimore, MD 21287, USA;*

<sup>4</sup>*Hugo W. Moser Research Institute at Kennedy Krieger, Inc., Baltimore MD, 21205, USA;*

<sup>5</sup>*Kennedy Krieger Institute – Johns Hopkins University for Cerebral Palsy Research Excellence, Baltimore, MD 21218, USA;*

\*Corresponding author:

Rangaramanujam M. Kannan, Arnall Patz Distinguished Professor of Ophthalmology, Center for Nanomedicine at the Wilmer Eye Institute, 400 North Broadway, Baltimore, Maryland 21231, USA

Tel.: +1 443-287-8634; Fax: +1 443-287-8635; e-mail: [krangar1@jhmi.edu](mailto:krangar1@jhmi.edu)

## Contents

### 1. Characterization data of intermediates and dendrimer conjugates

#### Compound 3:

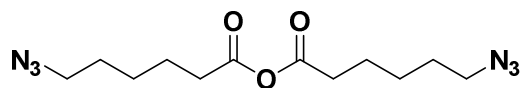

Rishi-B1-40-1H-cdcl3  
1H\_1D CDCl3 {C:\data\Kannan} KR\_rishi 2

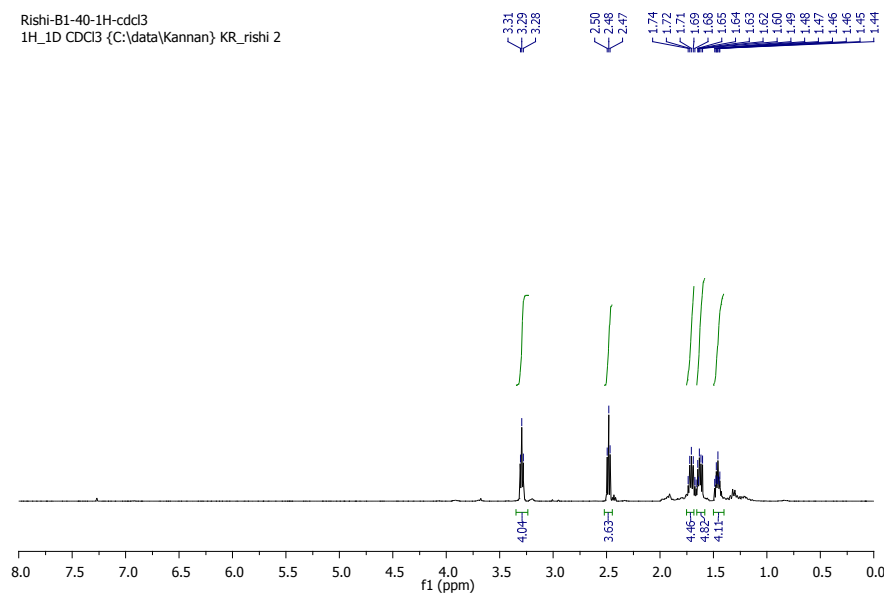

**Figure S1.**  $^1\text{H}$  NMR spectrum of compound **3** ( $\text{CDCl}_3$ , 500 MHz).

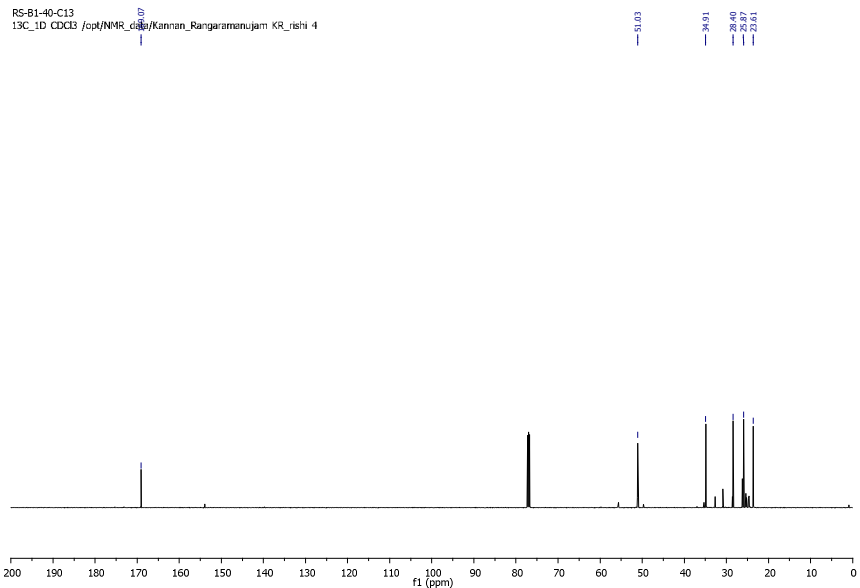

**Figure S2.**  $^{13}\text{C}\{^1\text{H}\}$  NMR of compound **3** ( $\text{CDCl}_3$ , 75 MHz).

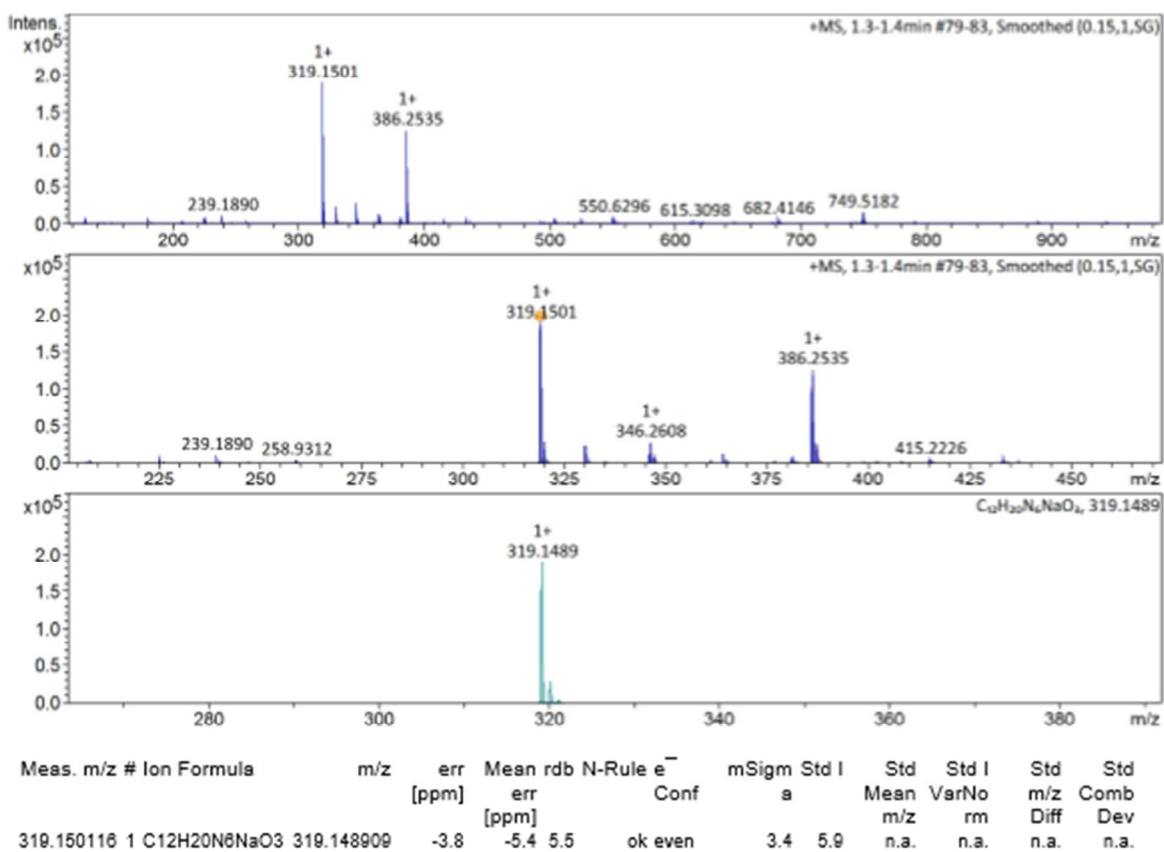

**Figure S3.** HRMS ( $\text{ESI}^+$ ) spectrum of compound **3**.

### Compound 5:

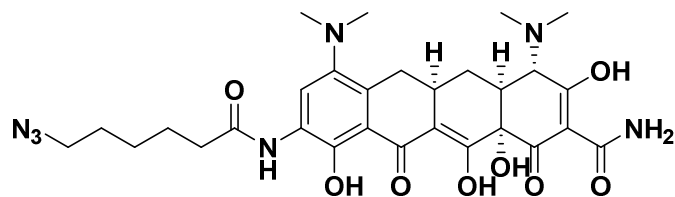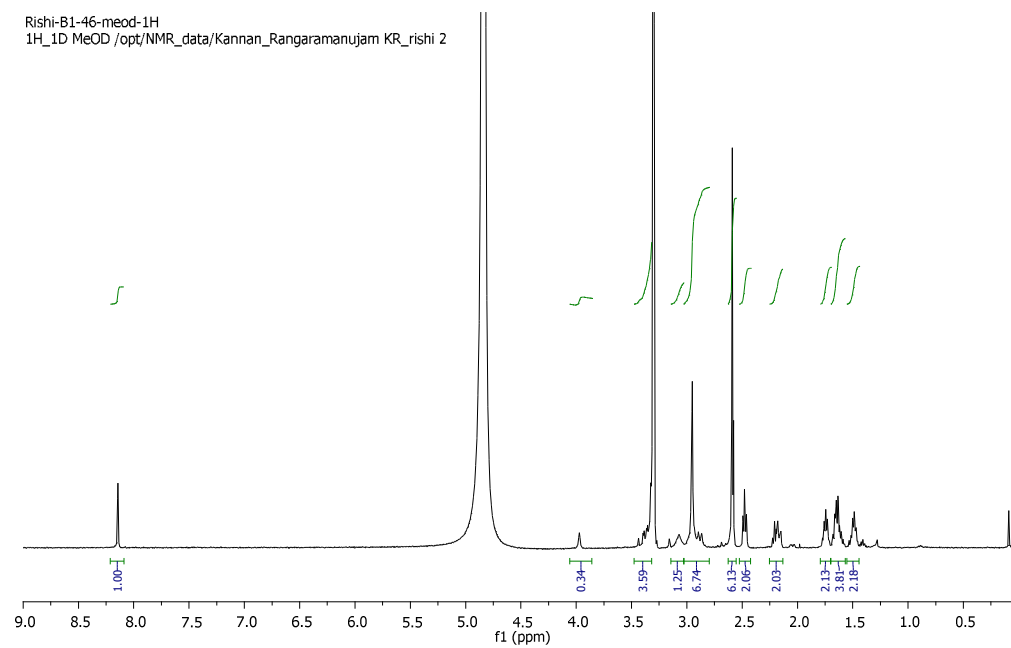

**Figure S4.** <sup>1</sup>H NMR spectrum of compound 5 (CD<sub>3</sub>OD, 500 MHz).

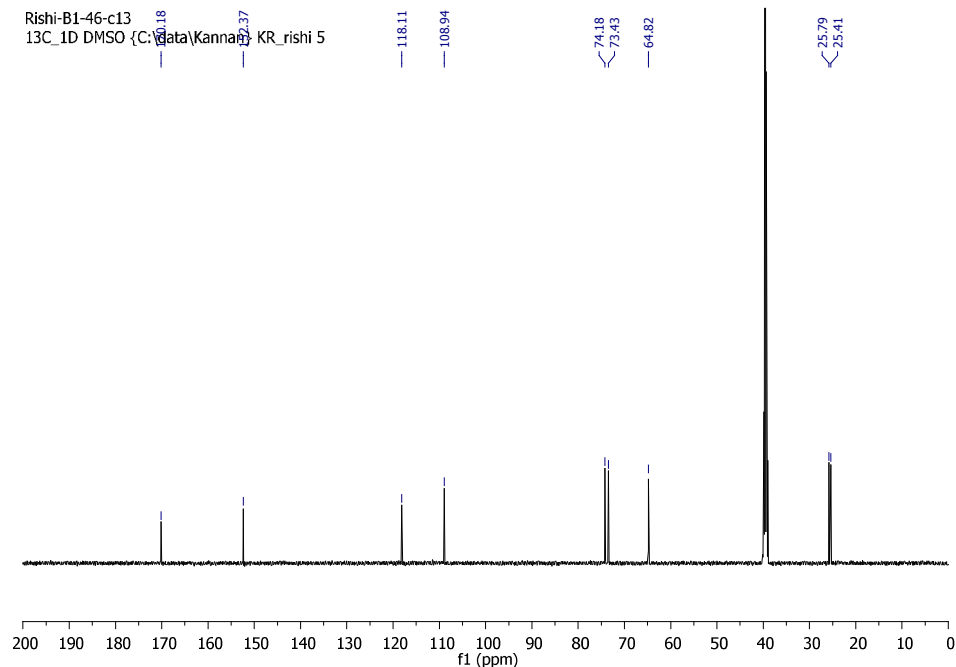

**Figure S5.**  $^{13}\text{C}$   $\{^1\text{H}\}$  NMR of compound **5** (DMSO, 75 MHz)

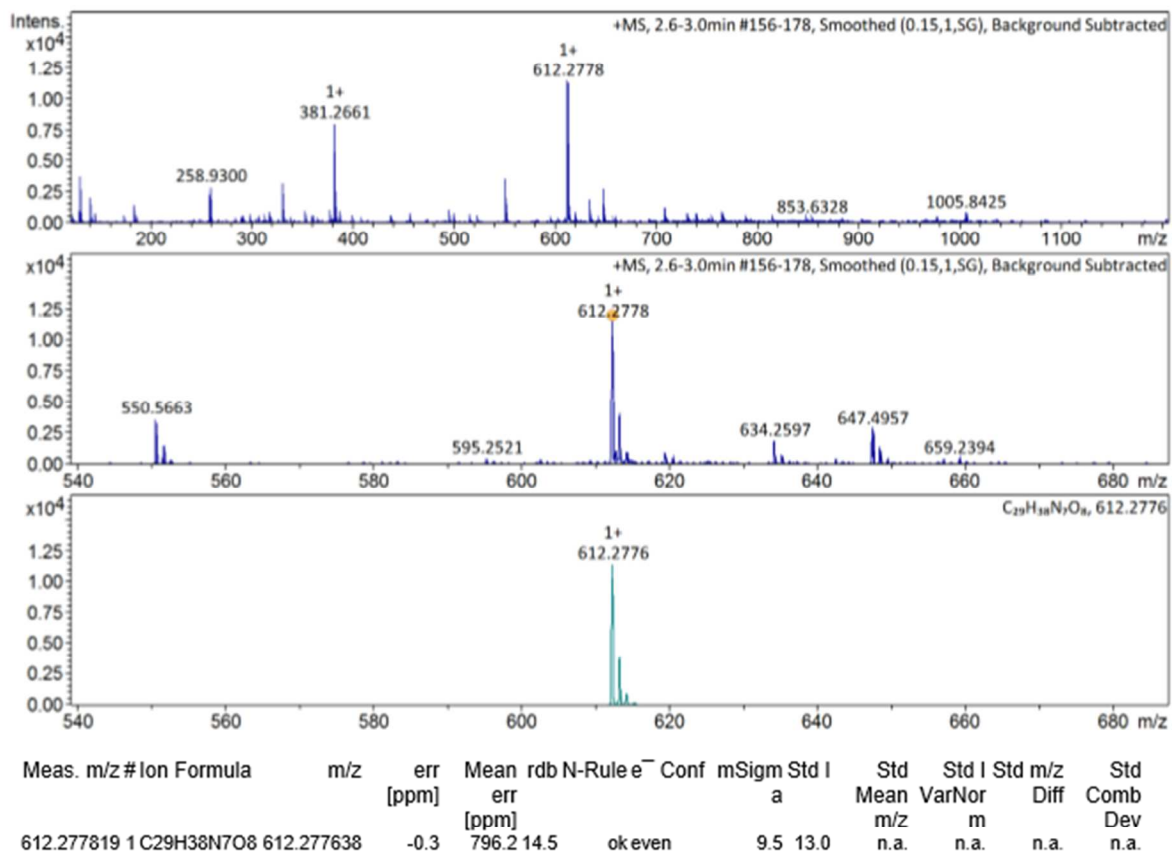

**Figure S6.** HRMS (ESI+) spectrum of compound **5**

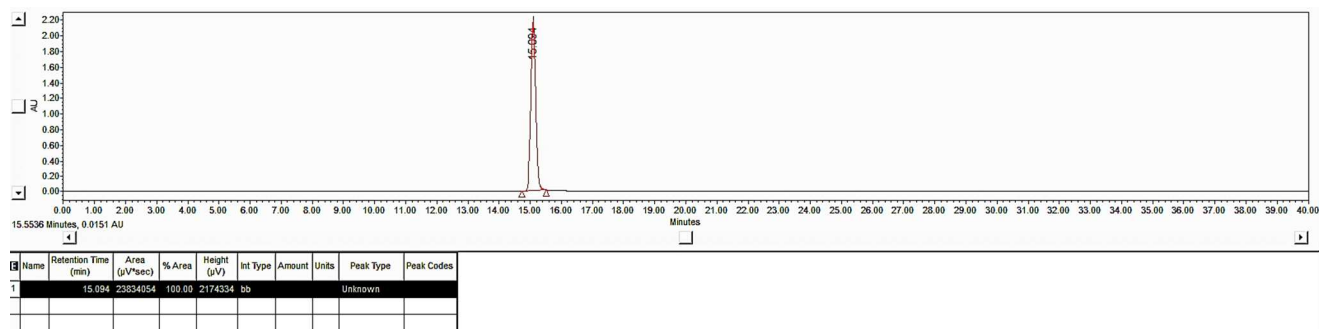

**Figure S7.** HPLC trace of compound 5

**Compound 7:**

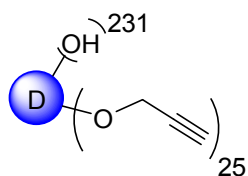

Rishi-B1-53-1Hpp  
1H\_1D DMSO {C:\data\Kannan} KR\_rishi 8

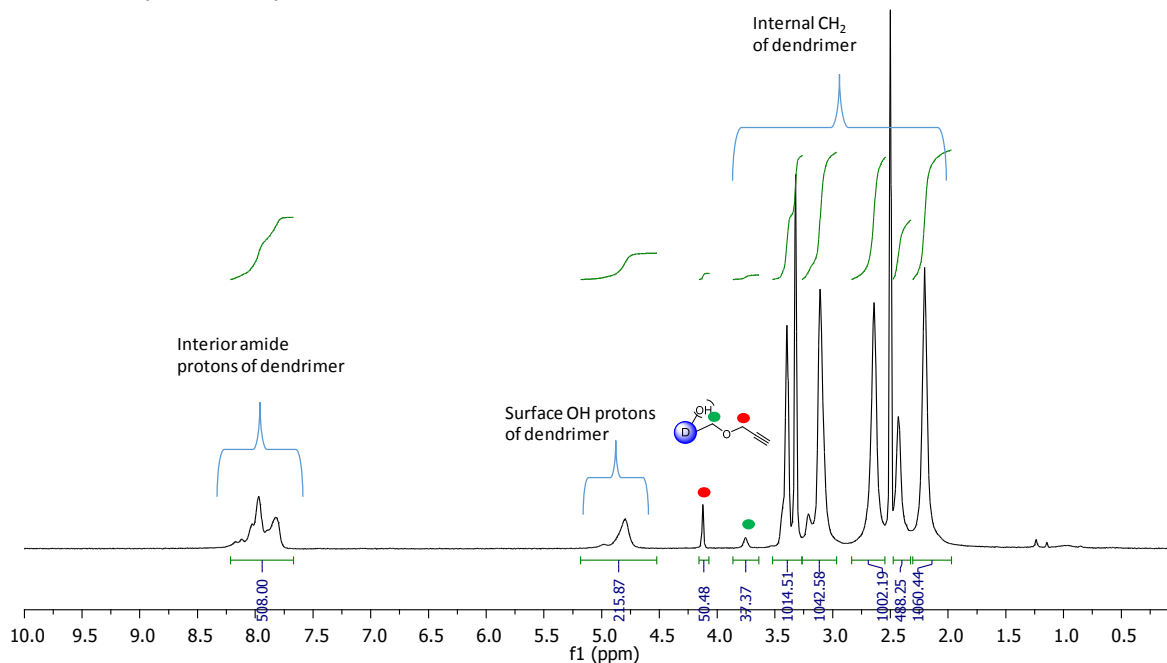

**Figure S8.** <sup>1</sup>H NMR spectrum of compound 7 (DMSO, 500 MHz).

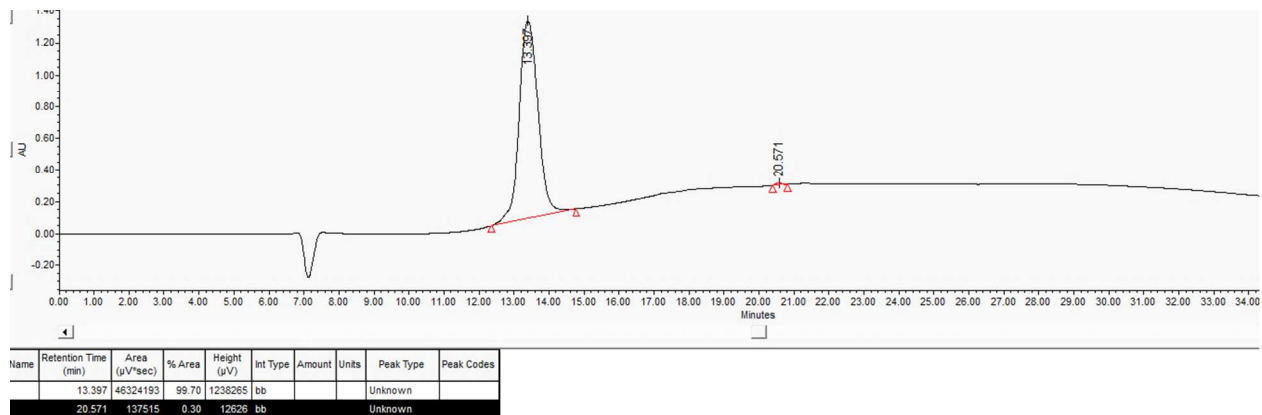

**Figure S9.** HPLC trace of compound 7.

## Compound 8:

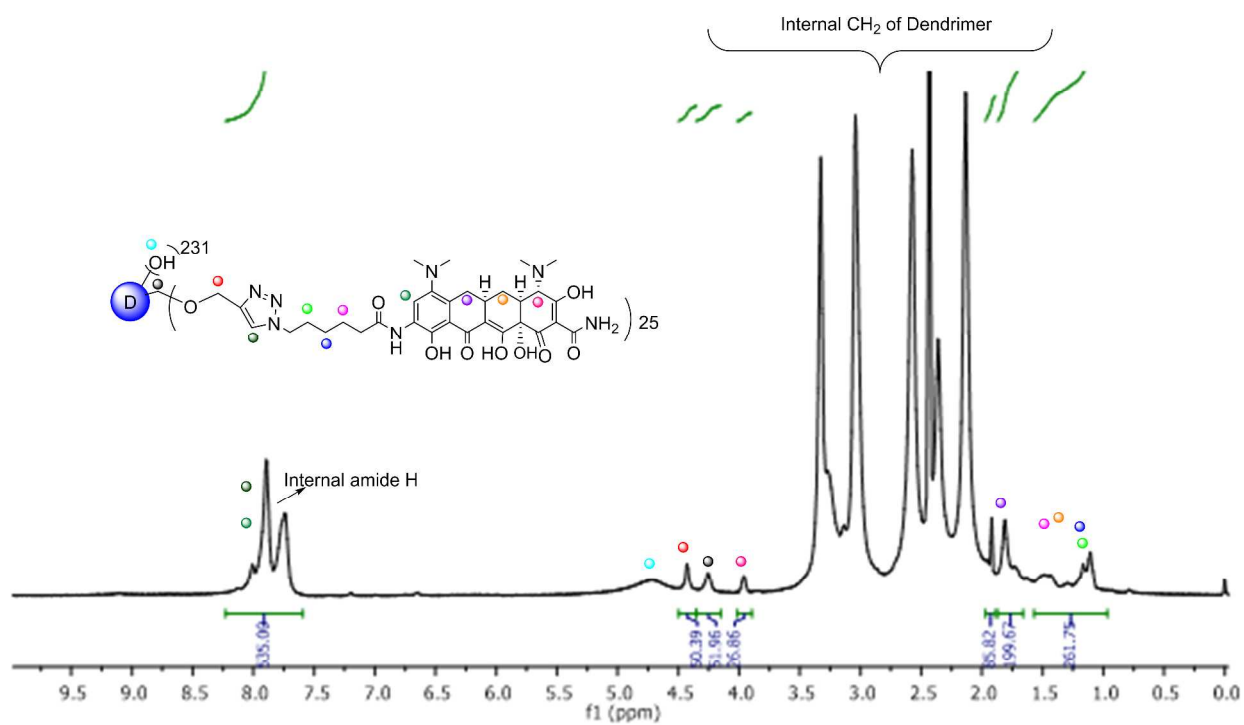

**Figure S10.** <sup>1</sup>H NMR spectrum of compound **8** (DMSO, 500 MHz).



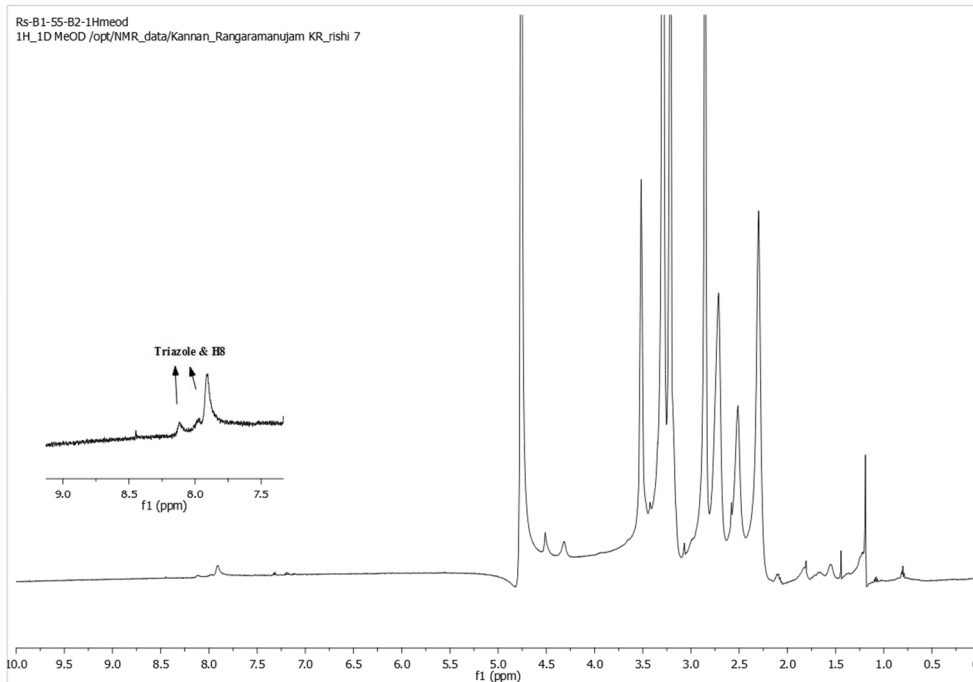

**Figure S11.**  $^1\text{H}$  NMR spectrum of compound **8** ( $\text{CD}_3\text{OD}$ , 500 MHz).

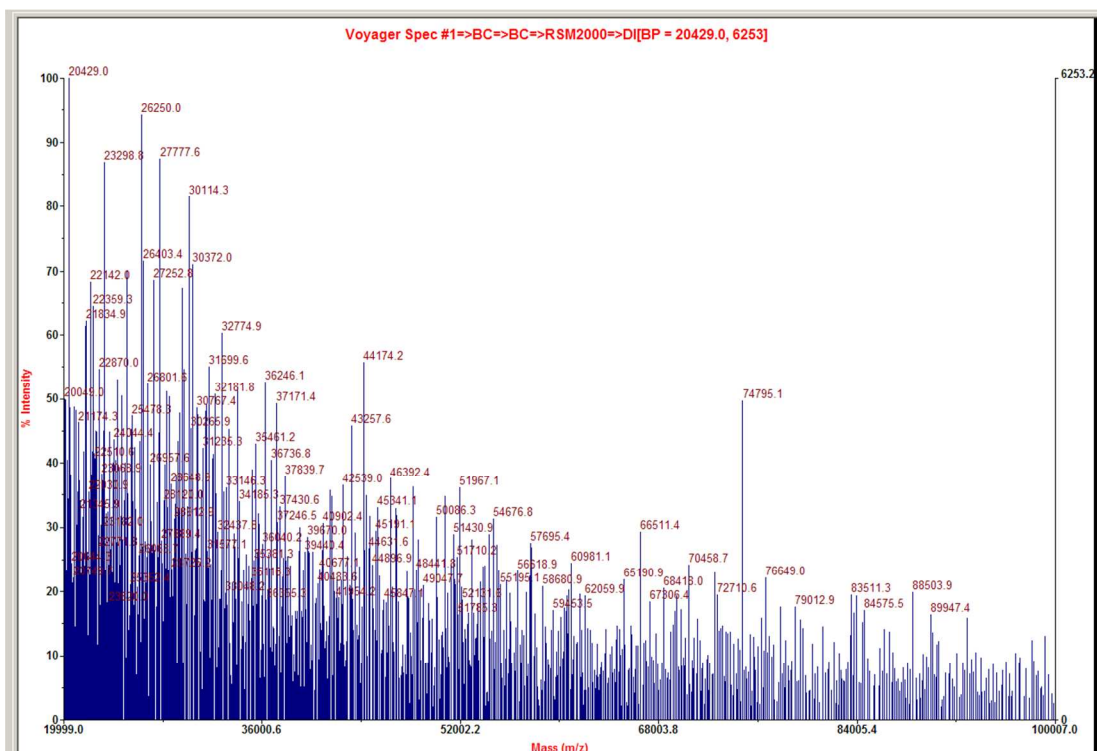

**Figure S12.** MALDI-TOF trace for compound **8** (DHB matrix).

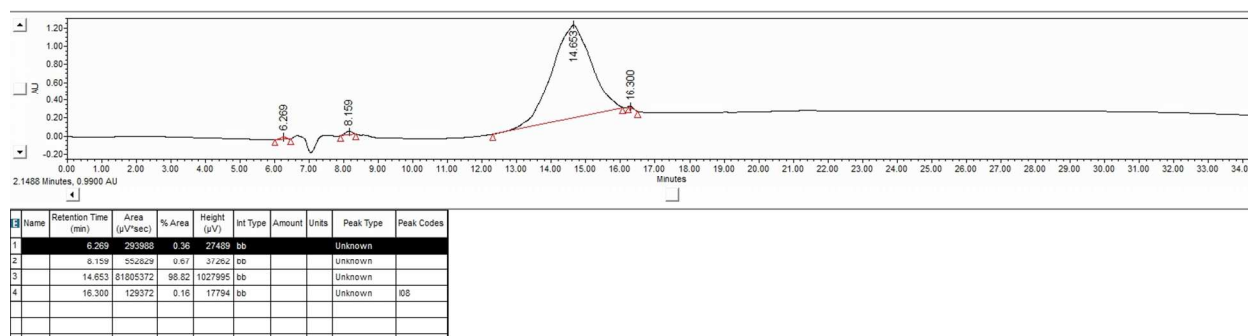

Figure S13. HPLC trace of compound 8.

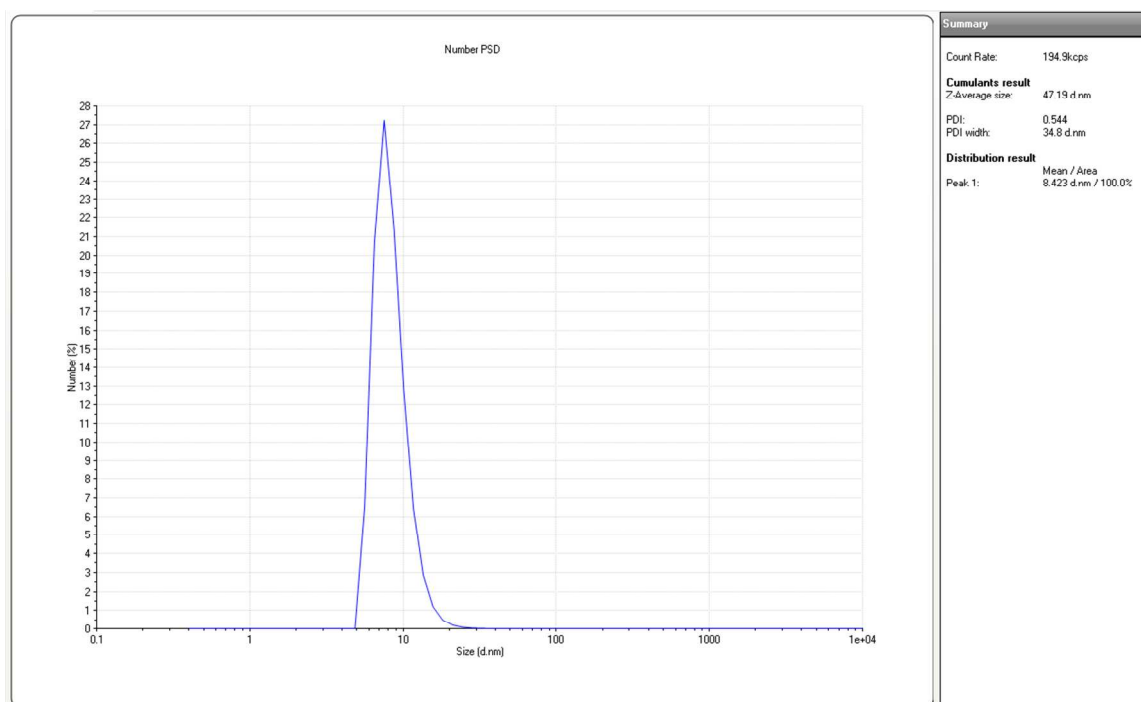

|            |  |  |      |       |        |       |       |       |       |  |
|------------|--|--|------|-------|--------|-------|-------|-------|-------|--|
| Mean 2,4,5 |  |  | 25.0 | 49.41 | 8.279  | 115.8 | 12.93 | 0.536 | 182.3 |  |
| Std Dev    |  |  | 0.0  | 4.170 | 0.6453 | 16.16 | 1.294 | 0.006 | 4.6   |  |

Figure S14. DLS size distribution of dendrimer 8 in water at 25°C.

## Compound 9:

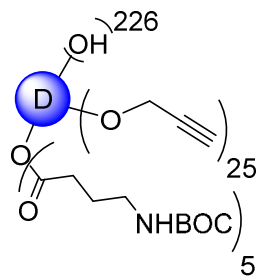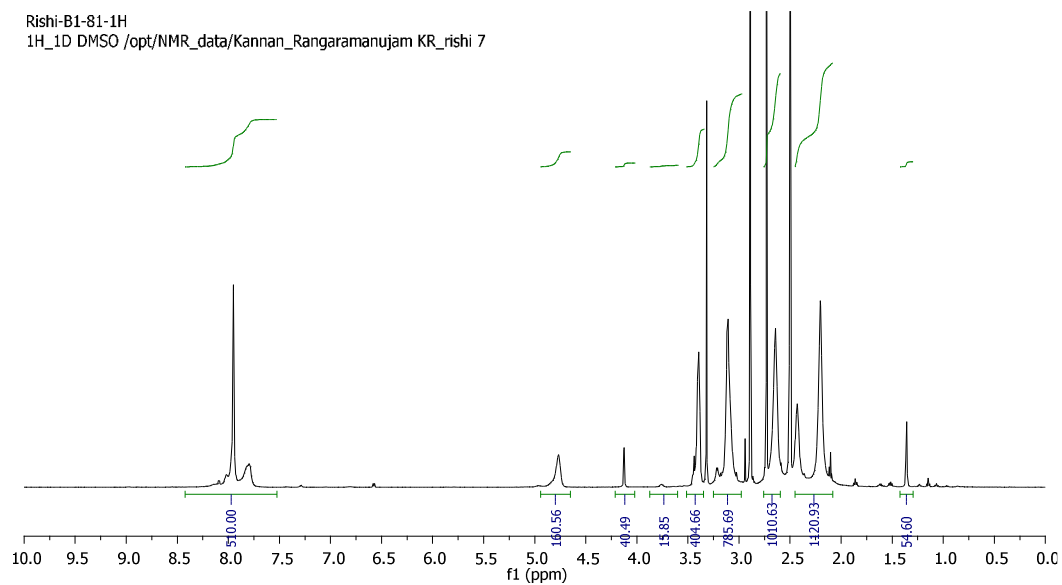

**Figure S15.** <sup>1</sup>H NMR spectrum of compound 9 (DMSO, 500 MHz).

## Compound 11:

Rishi-B1-88-1H  
1H\_1D DMSO /opt/NMR\_data/Kannan\_Rangaramanujam KR\_rishi 4

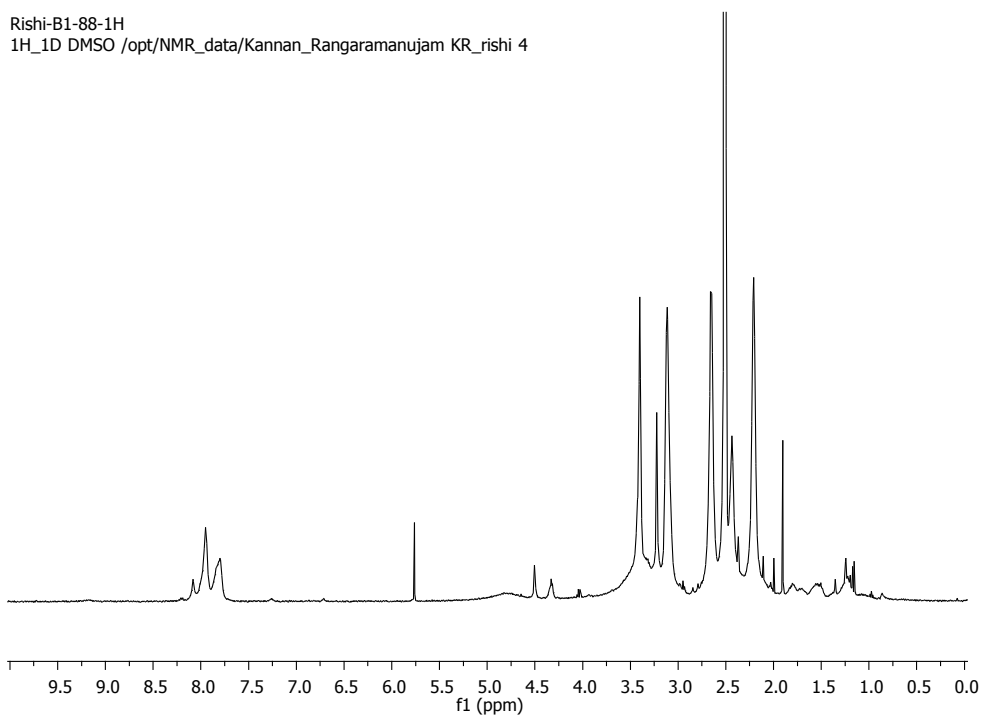

**Figure S16.**  $^1\text{H}$  NMR spectrum of compound **11** (DMSO, 500 MHz).

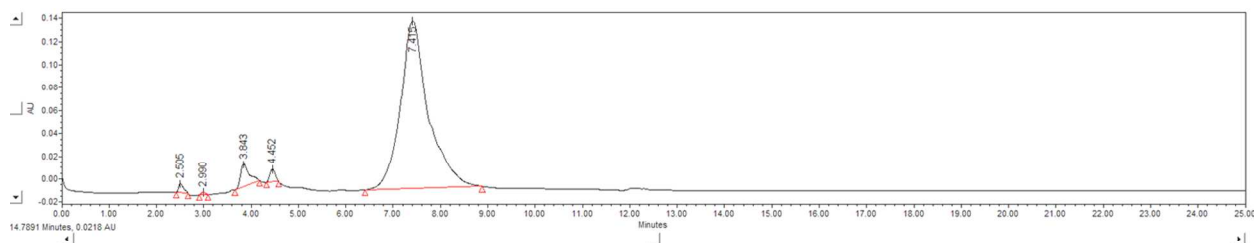

| Name | Retention Time (min) | Area (μV*sec) | % Area | Height (μV) | Int Type | Amount | Units | Peak Type | Peak Codes |
|------|----------------------|---------------|--------|-------------|----------|--------|-------|-----------|------------|
| 1    | 2.505                | 56147         | 0.88   | 7752        | bb       |        |       | Unknown   |            |
| 2    | 2.990                | 11721         | 0.18   | 2111        | bb       |        |       | Unknown   |            |
| 3    | 3.043                | 242914        | 3.82   | 19372       | bb       |        |       | Unknown   |            |
| 4    | 4.452                | 86845         | 1.37   | 10970       | bb       |        |       | Unknown   |            |
| 5    | 7.415                | 5954854       | 93.74  | 145424      | bb       |        |       | Unknown   |            |

**Figure S17.** HPLC trace of compound **11**.

**Compound 12:**

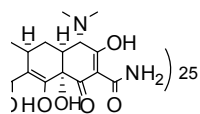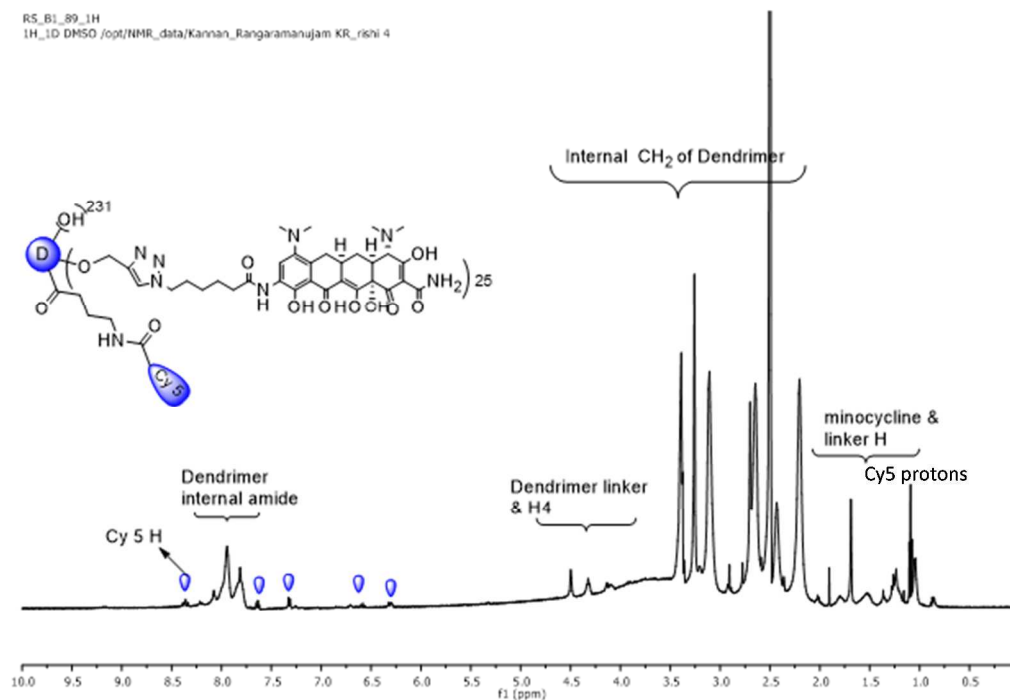

**Figure S18.**  $^1\text{H}$  NMR spectrum of compound **12** (DMSO, 500 MHz).

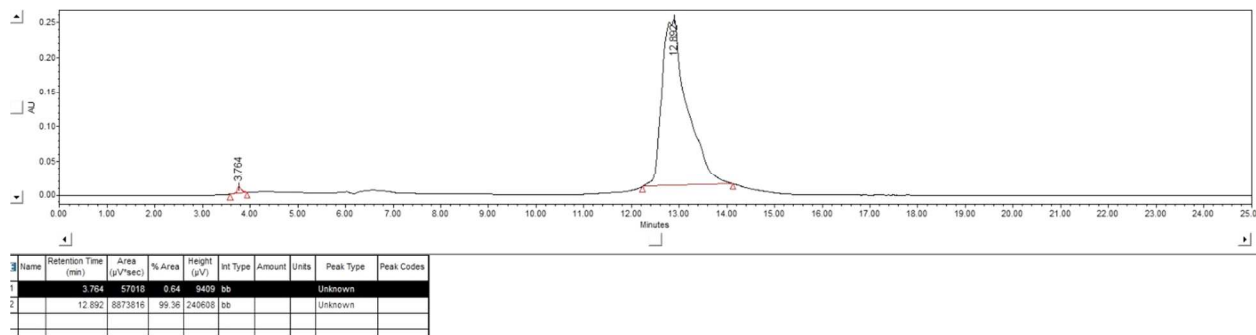

**Figure S19.** HPLC trace of compound **12** at 650 nm.
